# Supplementary material
Source: Research Square preprint supplement (doi:10.21203/rs.3.rs-9415762/v1)
Supplement: Supplementary file 1 [file f09de19cb2793aa90fea57c2.docx]

**Supplementary Materials for**

*Limosilactobacillus reuteri* alleviates intestinal oxidative damage by regulating gut microbiota-tryptophan metabolites-mitochondria axis-mediated oxidative stress and apoptosis

**Table S1** Primers used for quantitative real-time PCR

| Gene | Primer Sequence (5’ to 3’) | Accession No. |
| --- | --- | --- |
| *MFN1* | F: AGTTCTGCCGGACACTGAAG | XM_015291425.4 |
| R: CCTCCGCCATGATGTAACGAA |
| *MFN2* | F: ACTTCCATGGGGATCATCGT | XM_015882356.1 |
| R: GGCGTTCATACACATAAAGCAG |
| *DRP1* | F: TGGGCACGCAGAGCAG | NM_001079722.2 |
| R: AGCATCTATCTCATTTTCATCTCCA |
| *FIS1* | F: GGACGACCTGCTGAAGTTTG  R: CGTTGTACTTGCTTCGCACC | XM_006773401.2 |
|
| *LGR5* | F: TACGTCTTGCAGGAAATGGCT  R: GGAACCTGGCGTAGTTGGTTA | XM_046909876.1 |
| *β-catenin* | F: TGCGAATCAACCCAACAGTA  R: CTCACCAGCAGACATCAGGA | NM_205081.3 |
| *PCNA* | F: CAGATGTTCCTCTCGTTGTGGA  R: AGCAGATCACCCCCTCAGTC | NM_204170.3 |
| *Claudin-1* | F: TGGCCACGTCATGGTATGG  R: AACGGGTGTGAAAGGGTCATAG | NM_001013611.2 |
| *ZO-1* | F: TATGAAGATCGTGCGCCTCC | XM_015278981.1 |
| R: GAGGTCTGCCATCGTAGCTC |
| *Occludin* | F: TCATCGCCTCCATCGTCTAC | NM_205128.1 |
| R: TCTTACTGCGCGTCTTCTGG |
| *MUC-2* | F: AGCGAGATGT TGGCGATGAT | NM_001318434.1 |
| R: AAGTTGCCACACAGACCACA |
| *Caspase‑3* | F: TCCACCGAGATACCGGACTG | NM_204725.1 |
| R: ACAAAACTGCTTCGCTTGCT |
| *Bax* | F: GGGGTACGTCAATGTGGTCA | NM_001030920.1 |
| R: AGGAAGGCGGTGGGATAATG |
| *Bcl‑2* | F: ATGACCGAGTACCTGAACCG | NM_205339.2 |
| R: CAAGAGTGATGCAAGCTCCC |
| *mtD-loop* | F: AGGACTACGGCTTGAAAAGC | MT800504.1 |
| R: CATCTTGGCATCTTCAGTGCC |
| *NRF1* | F: ACACAGCAACAGACCACAAC | NM_001030646.1 |
| R: AACCTGGATGAGGGACACAG |
| *TFAM* | F: GAAACGTGGCAAAATCTATCCG | XM_015866188.1 |
| R: AGGTCTTCGCGTCCAAGCTC |
| *PGC-1α* | F: CATGTGCAACCAGGACTCTGT | NM_001006457.1 |
| R: ACGTCTAGTTCGGAGAGGTCA |
| *POLRMT* | F: CTTTGAGGTTTTCCAGCAGCAG  R: CTTTGAGGTTTTCCAGCAGCAG | XM 001927064.1 |
| *Nrf2* | F: CAGGGGTAGCAAGGTATGAGG  R: TTCCCAGTTCGGTGCAGAAG | NM_205117.2 |
| *Keap1* | F: TCAACTGGGTGCAGTACGAC  R: TCTGCGCCAGGTAATCCTTG | MN416132.1 |
| *HO-1* | F: CCACACAACGCTGAAAGCAT  R: GATGAAGTACAGGGACGCCG | NM_205344.2 |
| *NQO1* | F: AACCTCTTTCAACCACGCCA  R: AAGCACTCGGGGTTCTTGAG | NM_001277619.2 |
| *SOD1* | F: TGACCTCGGCAATGTGACTG  R: CATGGTACGGCCAATGATGC | NM_205064.2 |
| *GPX4* | F: ACGCTGGGGAATGCCATCA  R: CGGGCAGATCCTTCTCGATCA | NM_001346448.2 |
| *IL-1β* | F: TGCCTGCAGAAGAAGCCTCG | NM_204524.1 |
| R: CTCCGCAGCAGTTTGGTCAT |
| *IL-6* | F: GCAGGACGAGATGTGCAAGA | NM_204628.1 |
| R: ACCTTGGGCAGGTTGAGGTT |
| *IL-10* | F: GTCACCGCTTCTTCACCTGC | NM_001004414.2 |
| R: TCCCGTTCTCATCCATCTTCTCG |
| *TNF-α* | F: CCCTACCCTGTCCCACAACC | XM_046927265.1 |
| R: TGGGCGGTCATAGAACAGCA |
| *IκBα* | F: CTTCCAGAACAACCTCAGCCAGAC | NM_001001472.3 |
| R: CGCAGCCAGCCTTCAGCAG |
| *MyD88* | F: AGGATGGTGGTCGTCATTTC | NM_001030962.2 |
| R: TTGGTGCAAGGATTGGTGTA |
| *NF-κB* | F: TGGAGAAGGCTATGCAGCTT | NM_205134.1 |
| R: CATCCTGGACAGCAGTGAGA |
| *TLR4* | F: TGAAAGAGCTGGTGGAACCC | NM_001030693.2 |
| R: CCAGGACCGAGCAATGTCAA |
| *β-actin* | F: ACCGGACTGTTACCAACACC | NM_205518.1 |
| R: CCTGAGTCAAGCGCCAAAAG |

**Table S2** Effects of *L. reuteri* on the production performance of older laying hens

| **Item** | **CON** | **LR** | ***P-value*** |
| --- | --- | --- | --- |
| Laying rate, % | |  |  |
| week1-5 | 79.80±0.95b | 83.40±0.63a | <0.001 |
| week6-10 | 76.60±1.11b | 81.20±0.79a | 0.018 |
| week1-10 | 78.20±1.95b | 82.30±1.34a | <0.001 |
| Average daily egg weight，g | |  |  |
| week1-5 | 51.23±0.48b | 53.75±0.28a | <0.001 |
| week6-10 | 49.50±0.62b | 52.71±0.40b | 0.021 |
| week1-10 | 50.37±1.05b | 53.23±0.64a | 0.004 |
| Average daily feed intake, g/hen per day | |  |  |
| week1-5 | 114.53±0.64 | 113.88±1.03 | 0.587 |
| week6-10 | 112.49±1.12 | 113.98±1.10 | 0.167 |
| week1-10 | 115.51±1.41 | 113.93±1.01 | 0.873 |
| Feed conversion ratio, g/g | |  |  |
| week1-5 | 2.23±0.03a | 2.12±0.03b | <0.001 |
| week6-10 | 2.27±0.04a | 2.16±0.06b | 0.025 |
| week1-10 | 2.25±0.04a | 2.14±0.05b | 0.016 |

Note: Data are mean ± standard error. Different superscripts in the same row indicate significant differences between groups (*P* < 0.05), while identical letters or no letters indicate no significant differences (*P* > 0.05). (n=6)
